# Supplementary material for: γ-Al2O3 supported Pd@CeO2 core@shell nanospheres: salting-out assisted growth and self-assembly, and their catalytic performance in CO oxidation
Source: PubMed Central journal article supplement (PMC5729413; doi:10.1039/c4sc03854a), 2015-02-27
Supplement: SC-006-C4SC03854A-s001.pdf [file SC-006-C4SC03854A-s001.pdf]

## Supporting Information

### **$\gamma$ -Al<sub>2</sub>O<sub>3</sub> Supported Pd@CeO<sub>2</sub> Core@Shell Nanospheres: Salting-out Assisted Growth and Self-assembly, and Their Catalytic Performance on CO Oxidation**

*Xiao Wang, Dapeng Liu, \* Junqi Li, Jiangman Zhen, Fan Wang, and Hongjie*

*Zhang\**

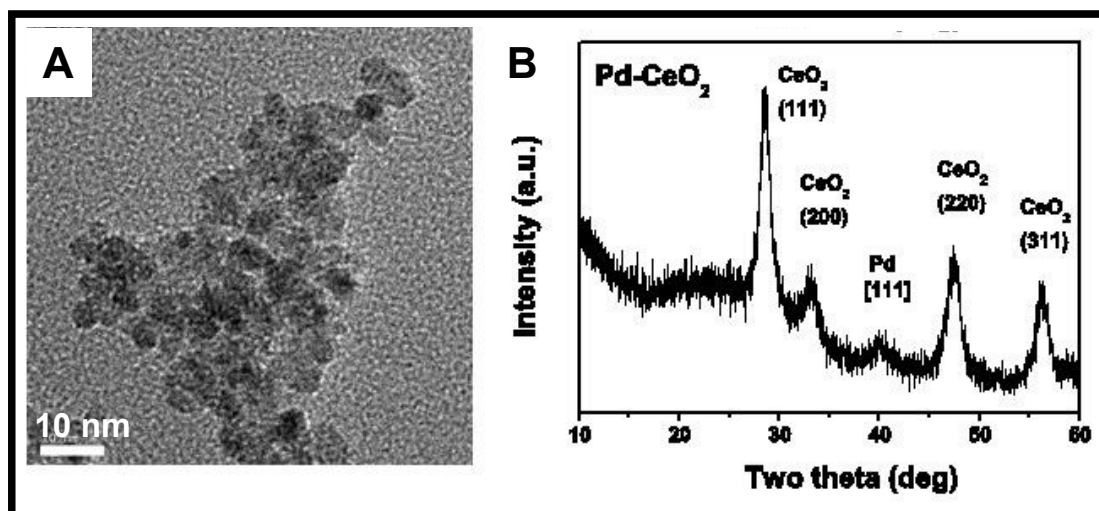

**Figure S1.** TEM (A) and XRD pattern (B) of the Pd-CeO<sub>2</sub> hybrids which are prepared according to our previously reported Pt@CeO<sub>2</sub> system.

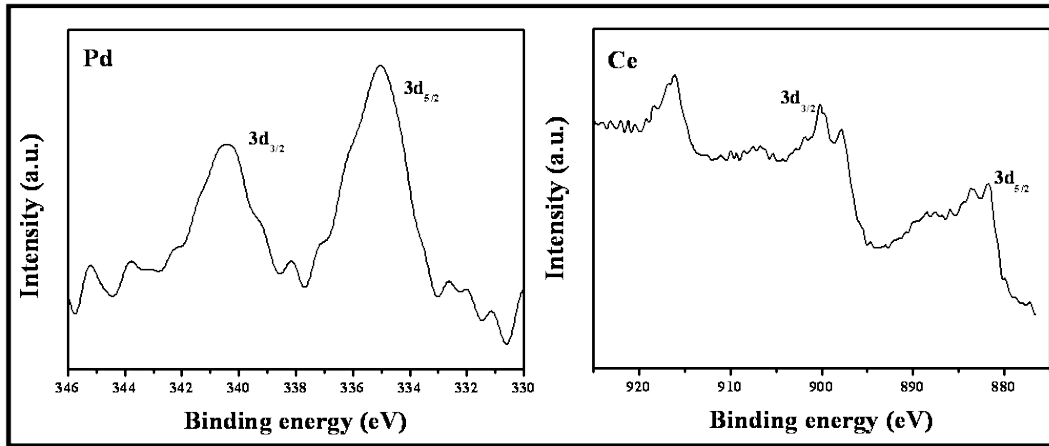

**Figure S2.** XPS analysis of Pd and Ce in Pd@CeO<sub>2</sub>.

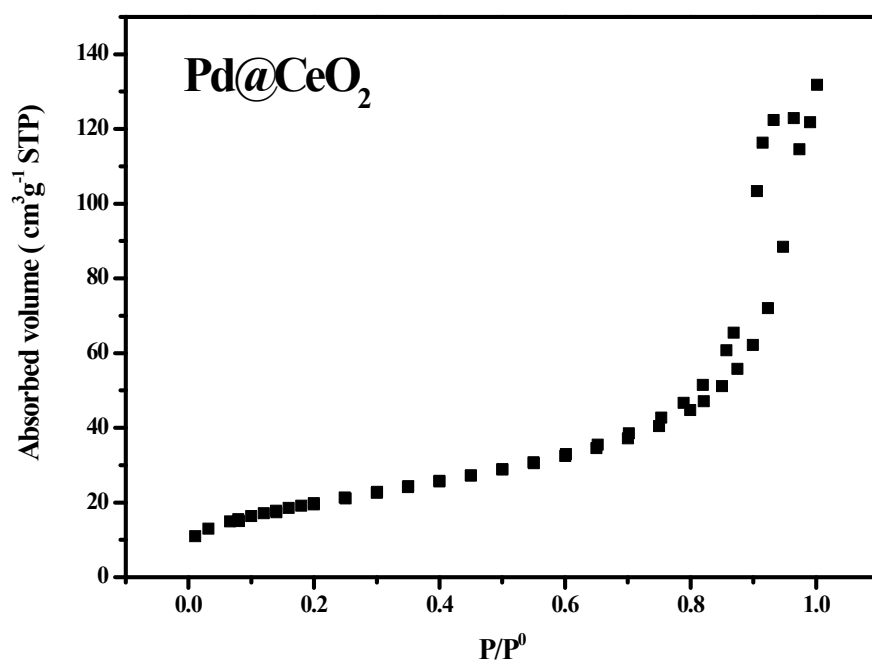

**Figure S3.** The BET curve of 13 nm-Pd@CeO<sub>2</sub>.

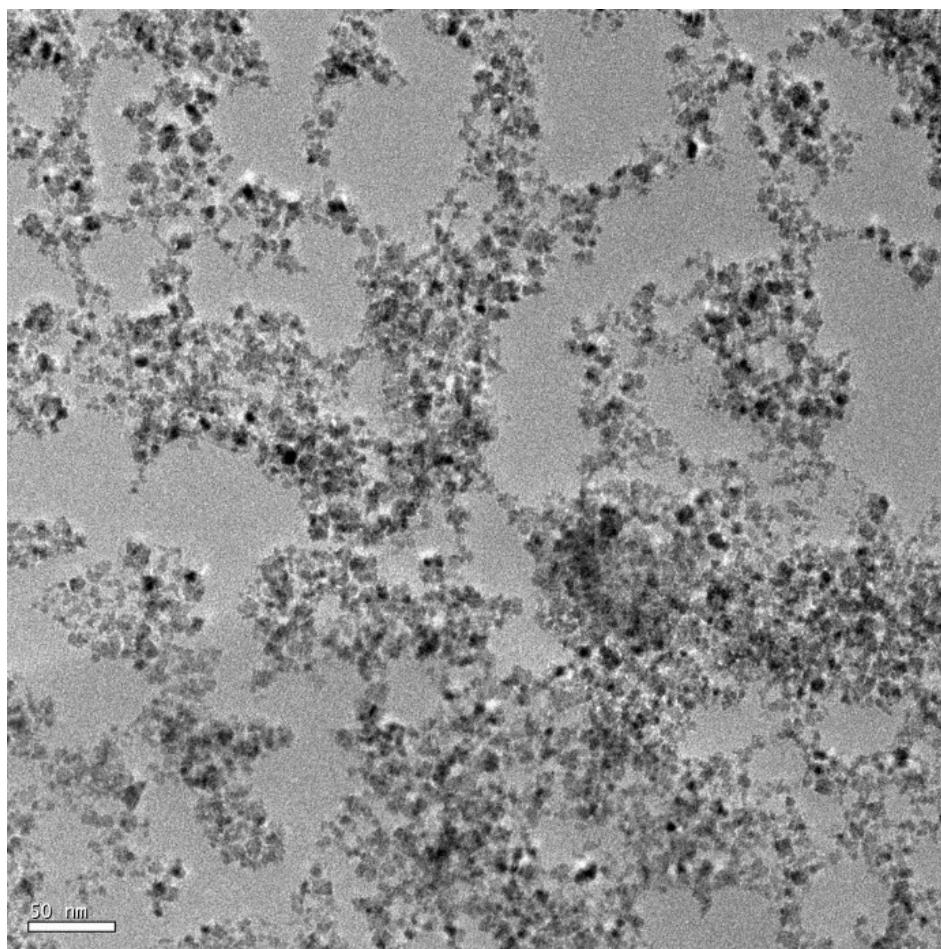

**Figure S4.** TEM images of Pd-CeO<sub>2</sub> prepared without using KBr.

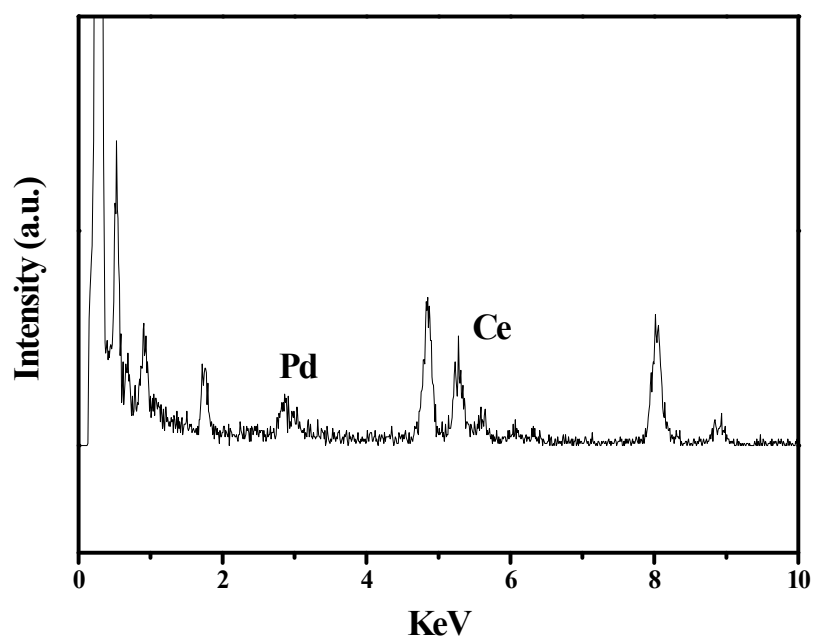

**Figure S5.** EDX curve of Pd-CeO<sub>2</sub> sample prepared without using KBr.

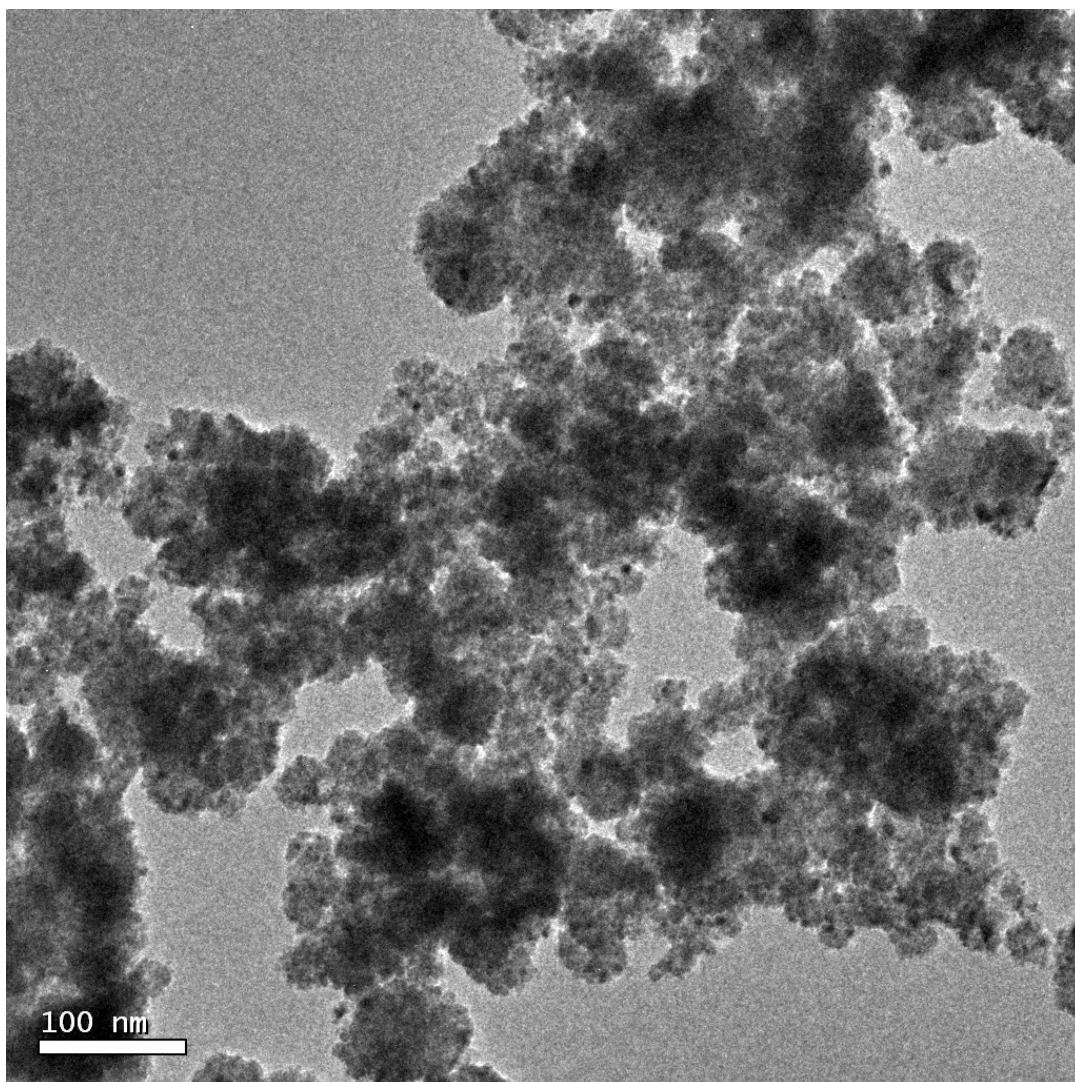

**Figure S6.** TEM images of Pd-CeO<sub>2</sub> synthesized by addition of 50 mg KBr.

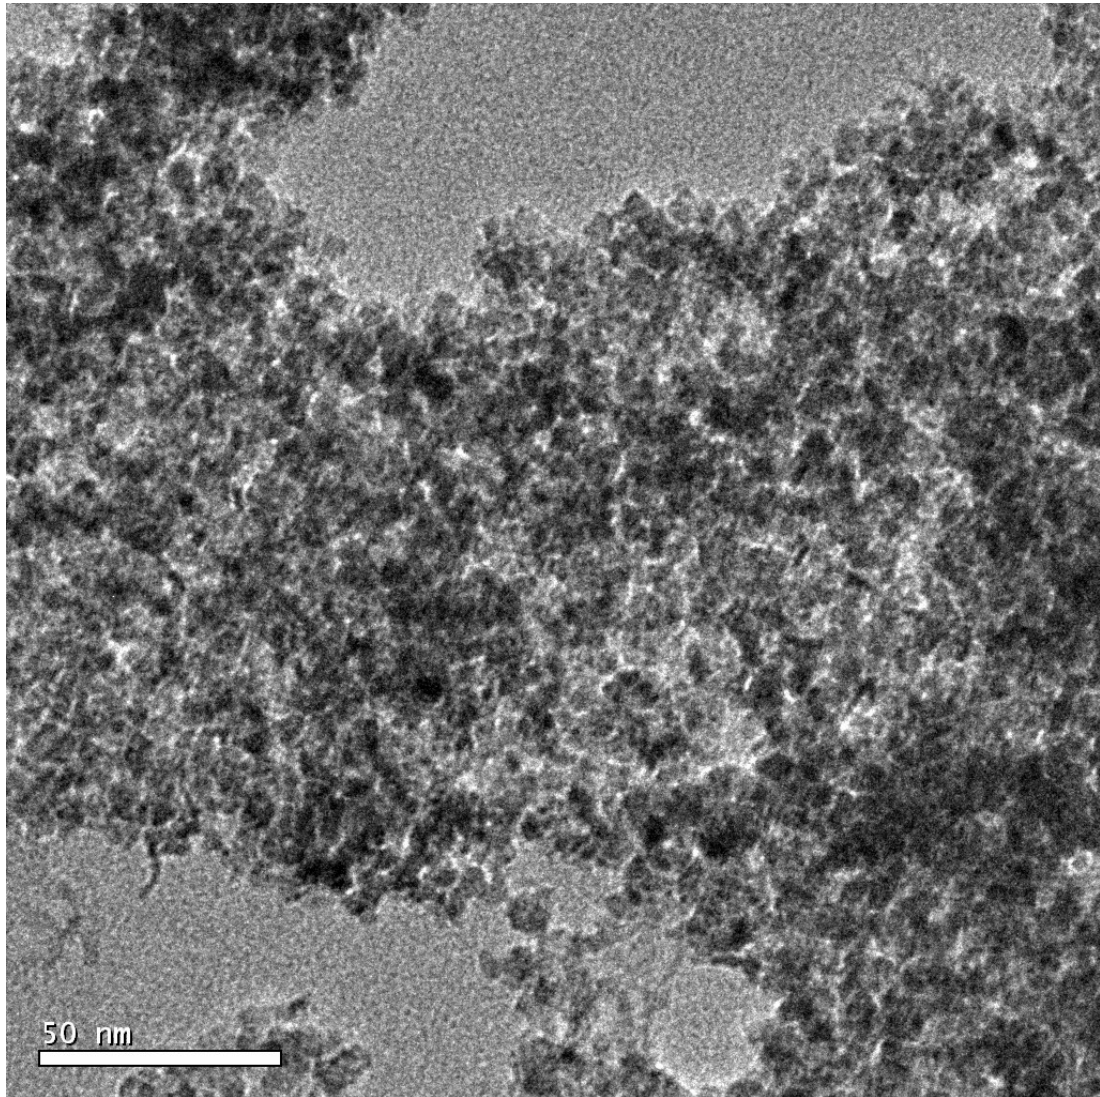

**Figure S7.** TEM image of Pd@CeO<sub>2</sub> prepared by using NaOH instead of NH<sub>3</sub>•H<sub>2</sub>O.



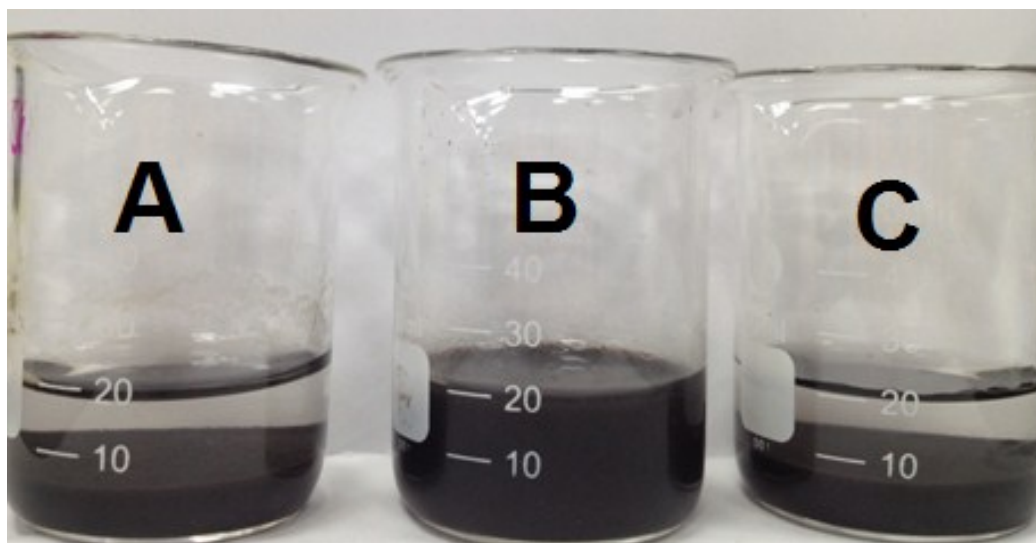

**Figure S8.** Photos of (A) the freshly prepared Pd@CeO<sub>2</sub> sample after standing for 30 min; (B) redistribution of purified Pd@CeO<sub>2</sub> in water after standing for 30 min in the absence of KBr; (C) redistribution of purified Pd@CeO<sub>2</sub> in 2 M KBr solution after standing for 30 min.

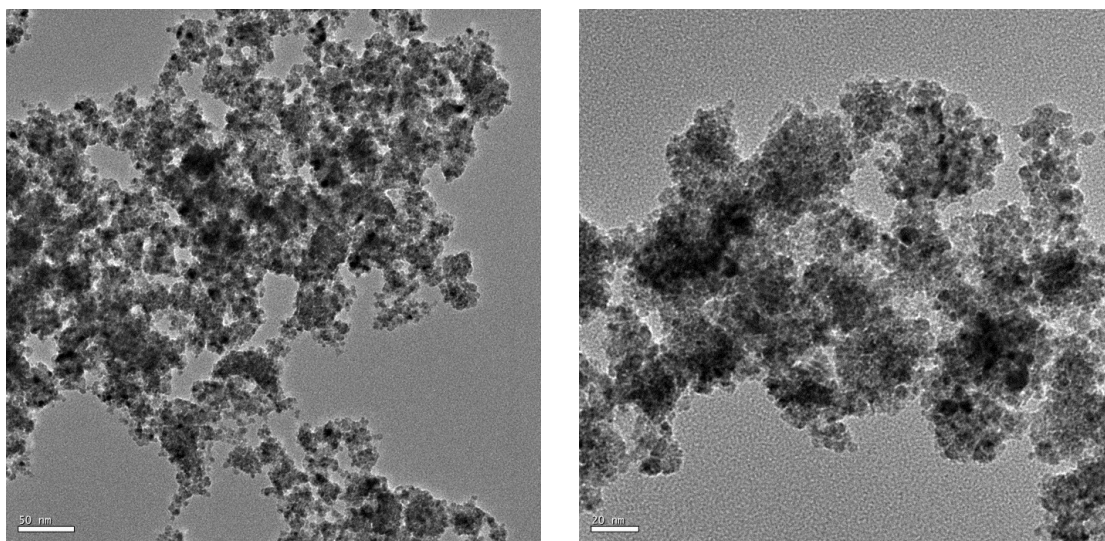

**Figure S9.** TEM images of Pd@CeO<sub>2</sub> prepared by using KCl (300 mg) instead of KBr (300 mg).

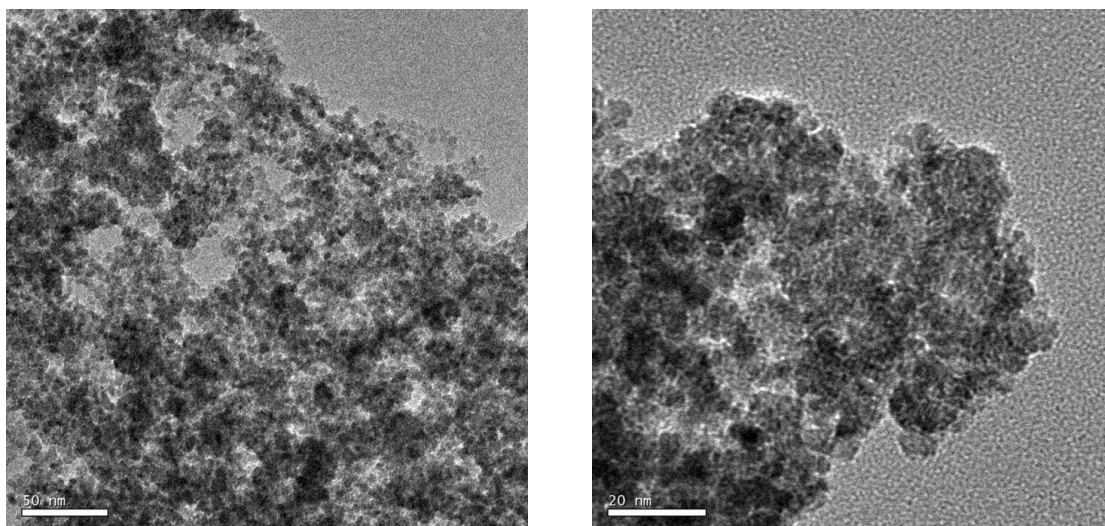

**Figure S9.** TEM images of the sample prepared by using KI (300 mg) instead of KBr (300 mg).

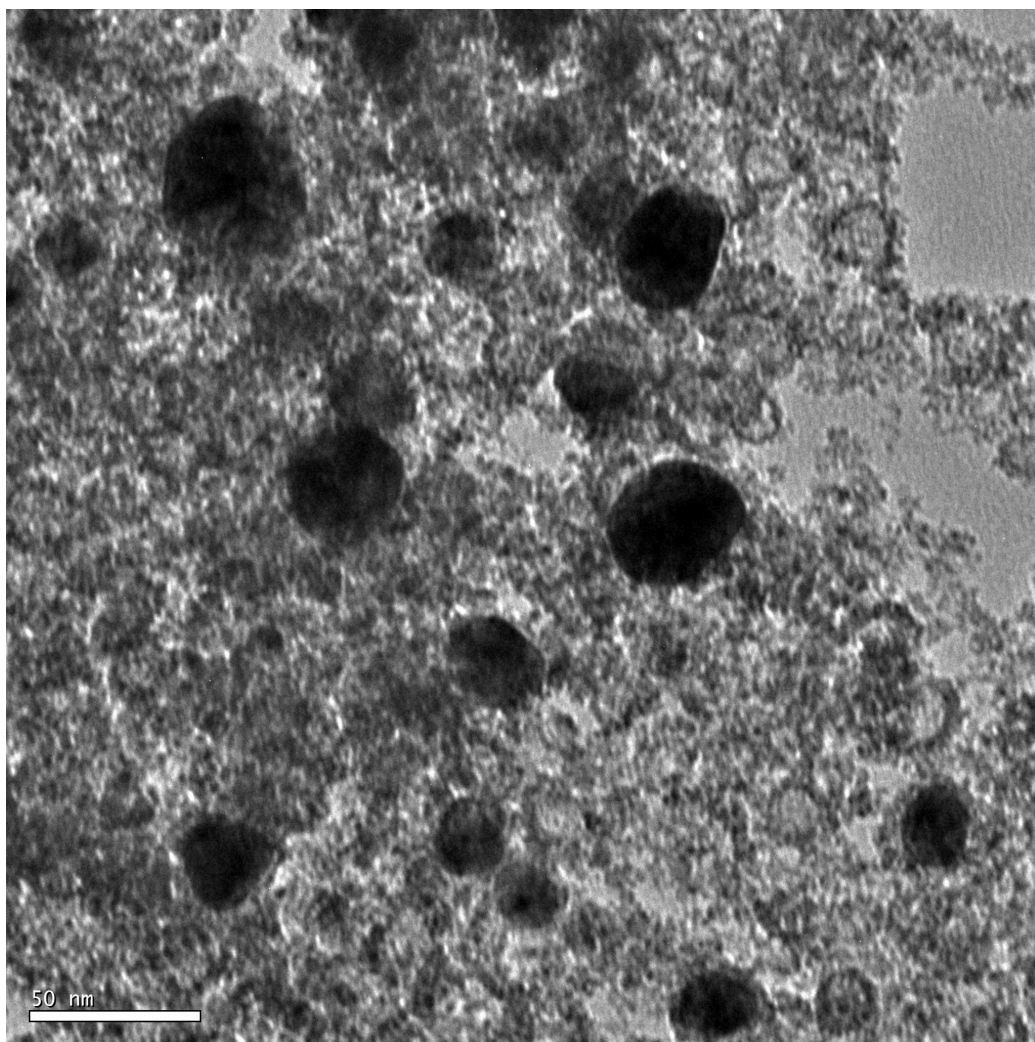

**Figure S11.** TEM image of Au-CeO<sub>2</sub> hybrid prepared by using KBr (300 mg).

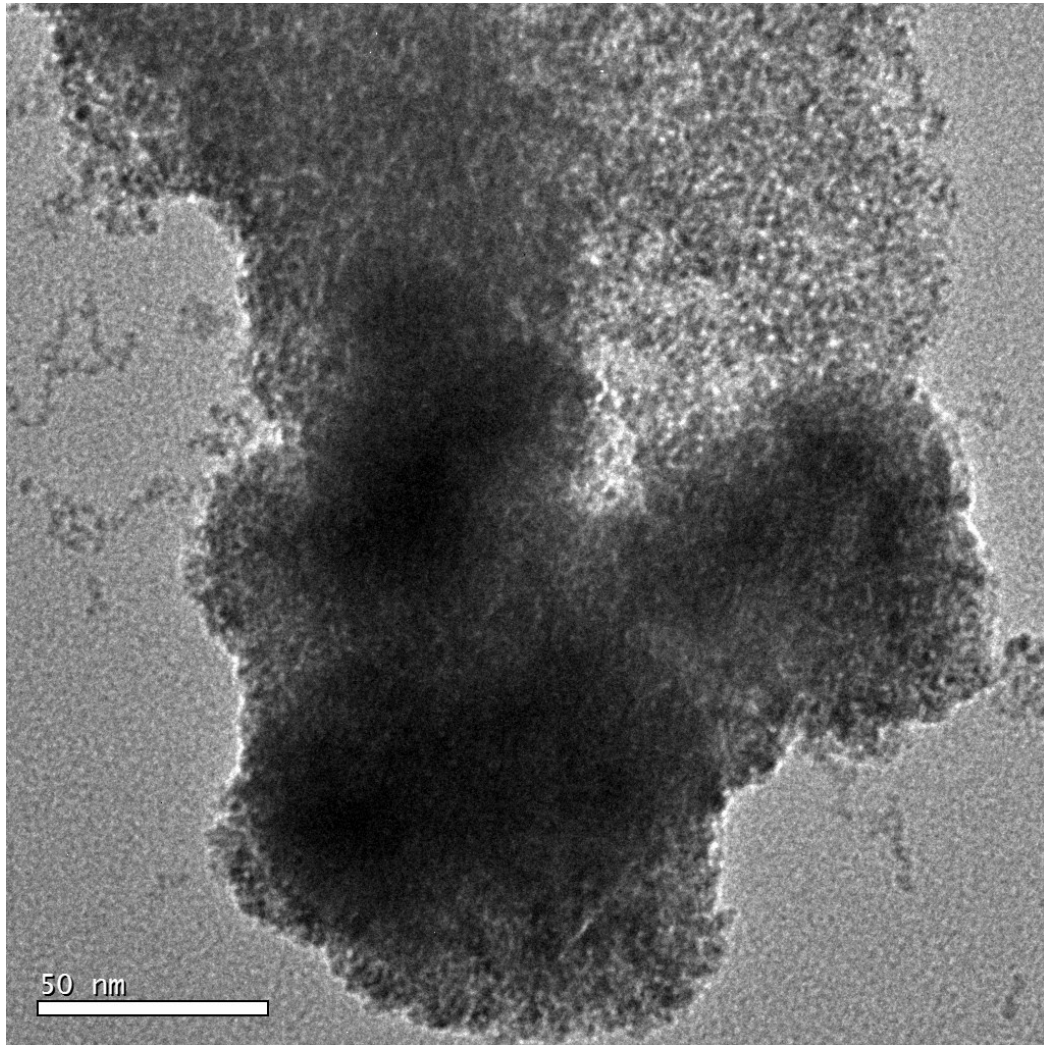

**Figure S12.** TEM image of Pt-CeO<sub>2</sub> hybrid prepared by using KBr (300 mg).

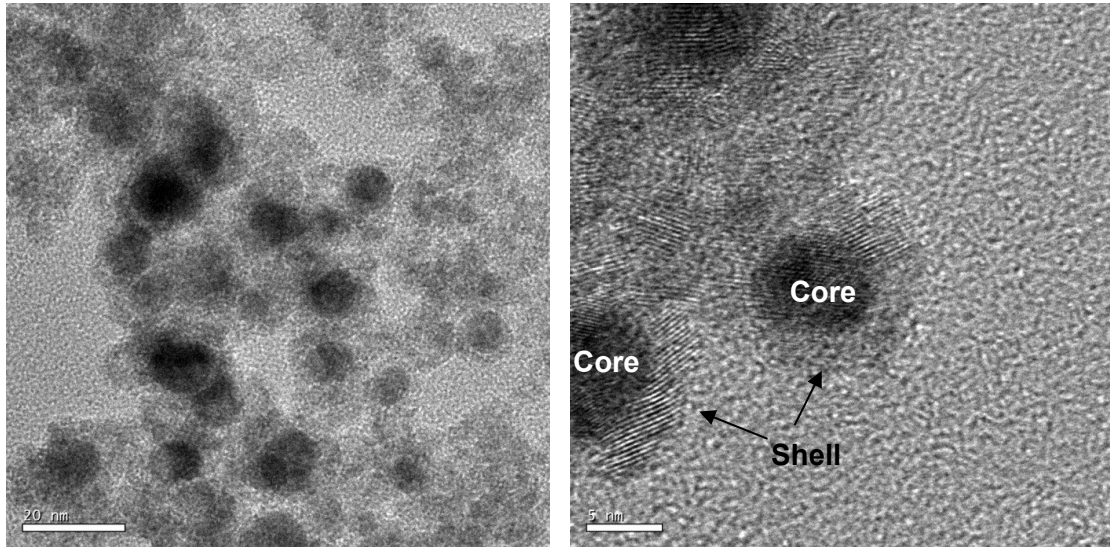

**Figure S13.** TEM images of Au@CeO<sub>2</sub> core@shell nanostructures prepared by using KCl (300 mg).

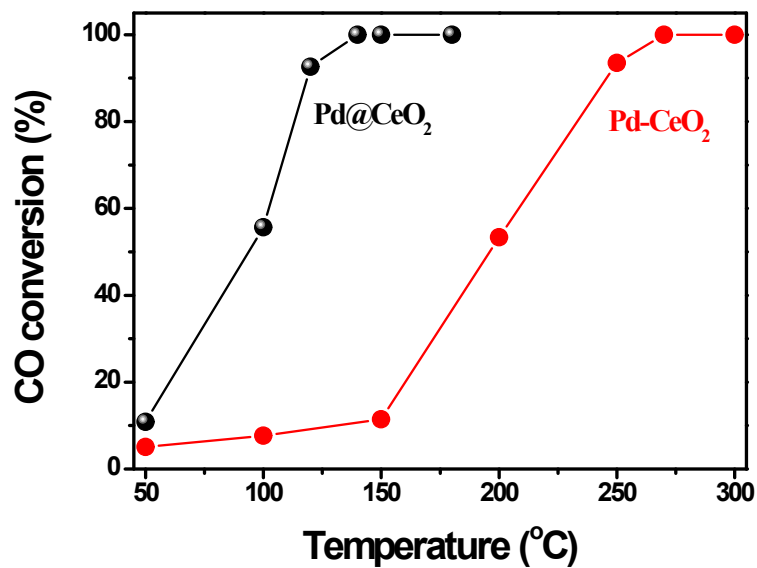

**Figure S14.** Catalytic CO oxidation curves of 8nm-Pd@CeO<sub>2</sub> and simply loaded Pd-CeO<sub>2</sub> samples after heat treatment.

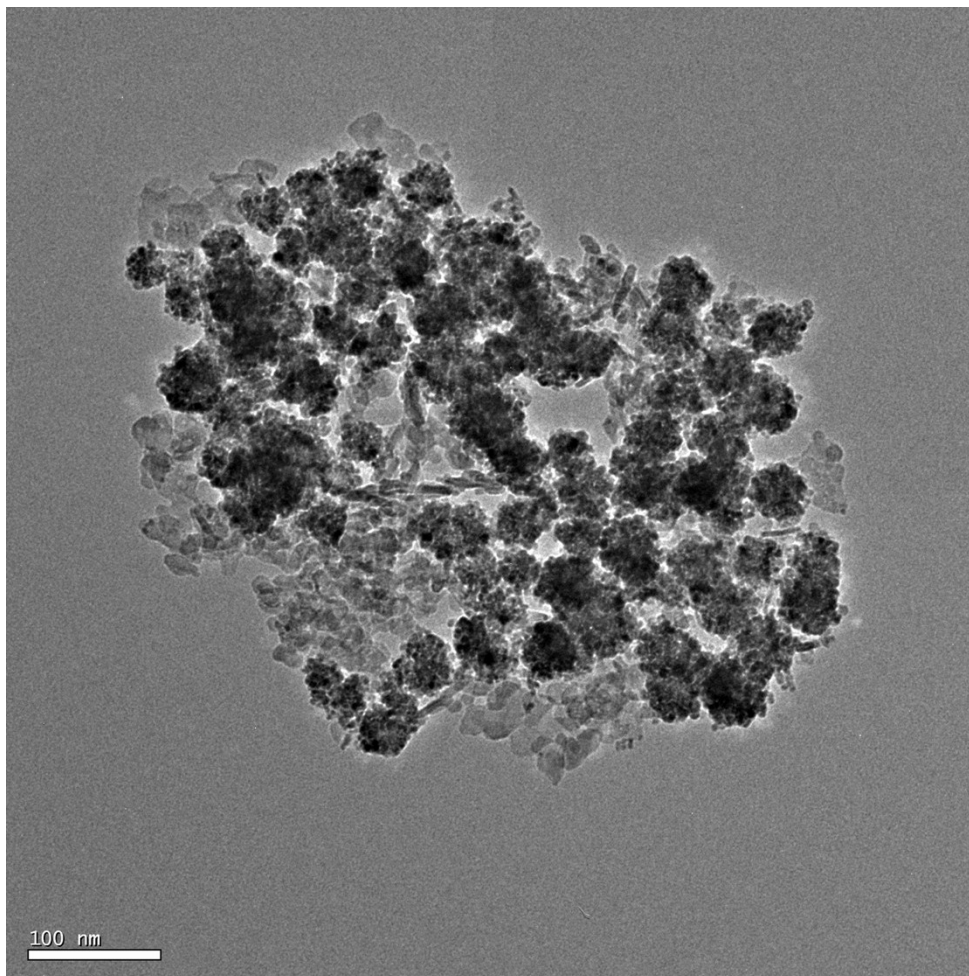

**Figure S15.** TEM images of 8 nm-Pd@CeO<sub>2</sub>/Al<sub>2</sub>O<sub>3</sub> after the cycling test.
